# Supplementary material for: QTL mapping and genome-wide association study reveal two novel loci associated with green flesh color in cucumber
Source: PubMed Central journal article supplement (PMC6556036; doi:10.1186/s12870-019-1835-6), 2019-06-07
Supplement: 12870_2019_1835_MOESM1_ESM.pdf [file 12870_2019_1835_MOESM1_ESM.pdf]

Supplementary Fig. 1

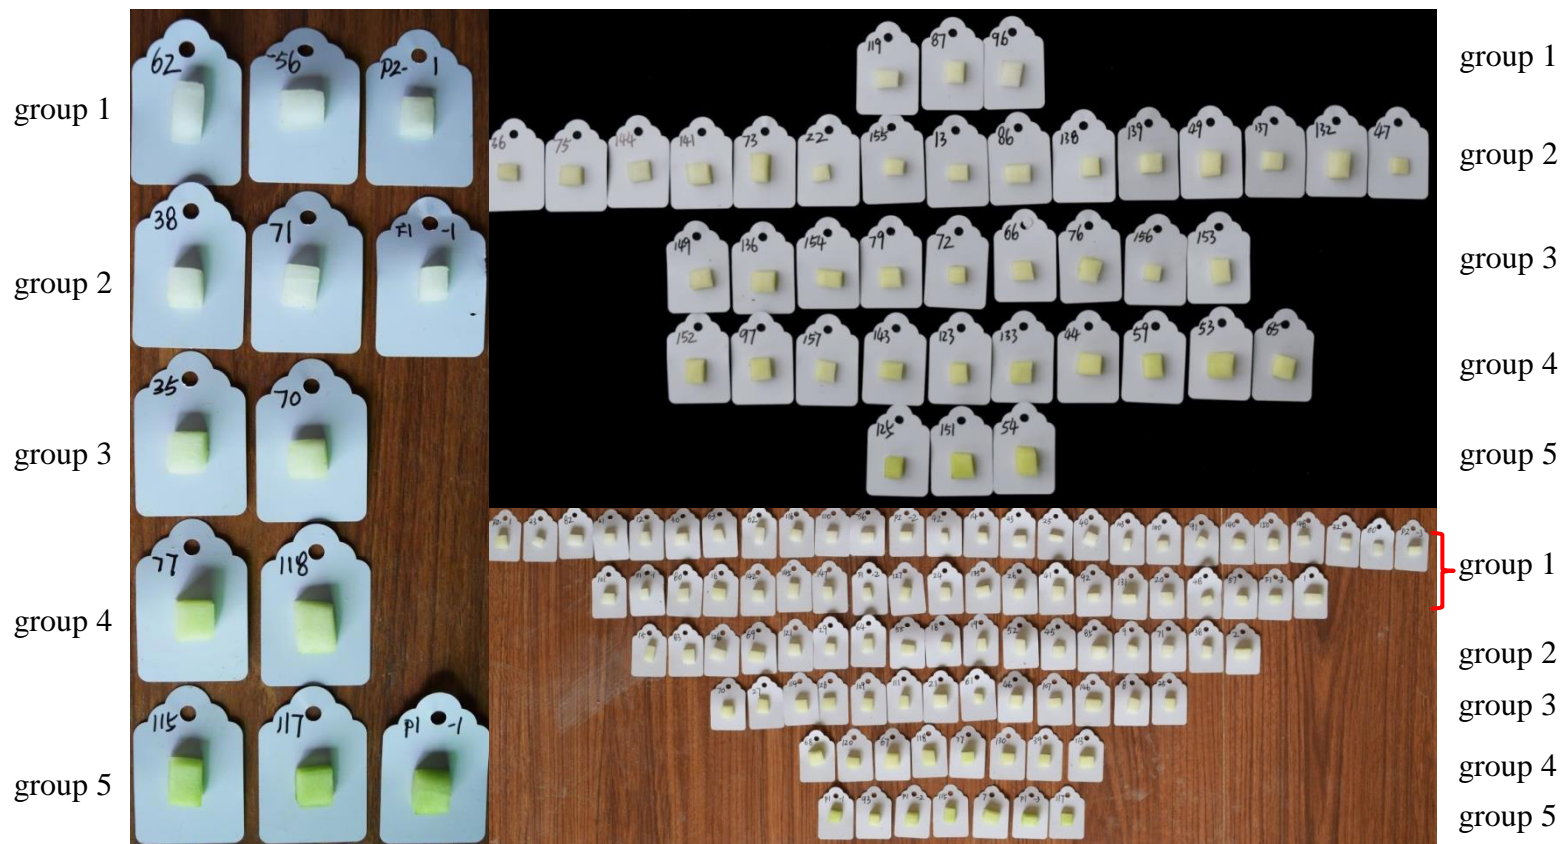

# Supplementary Fig. 2

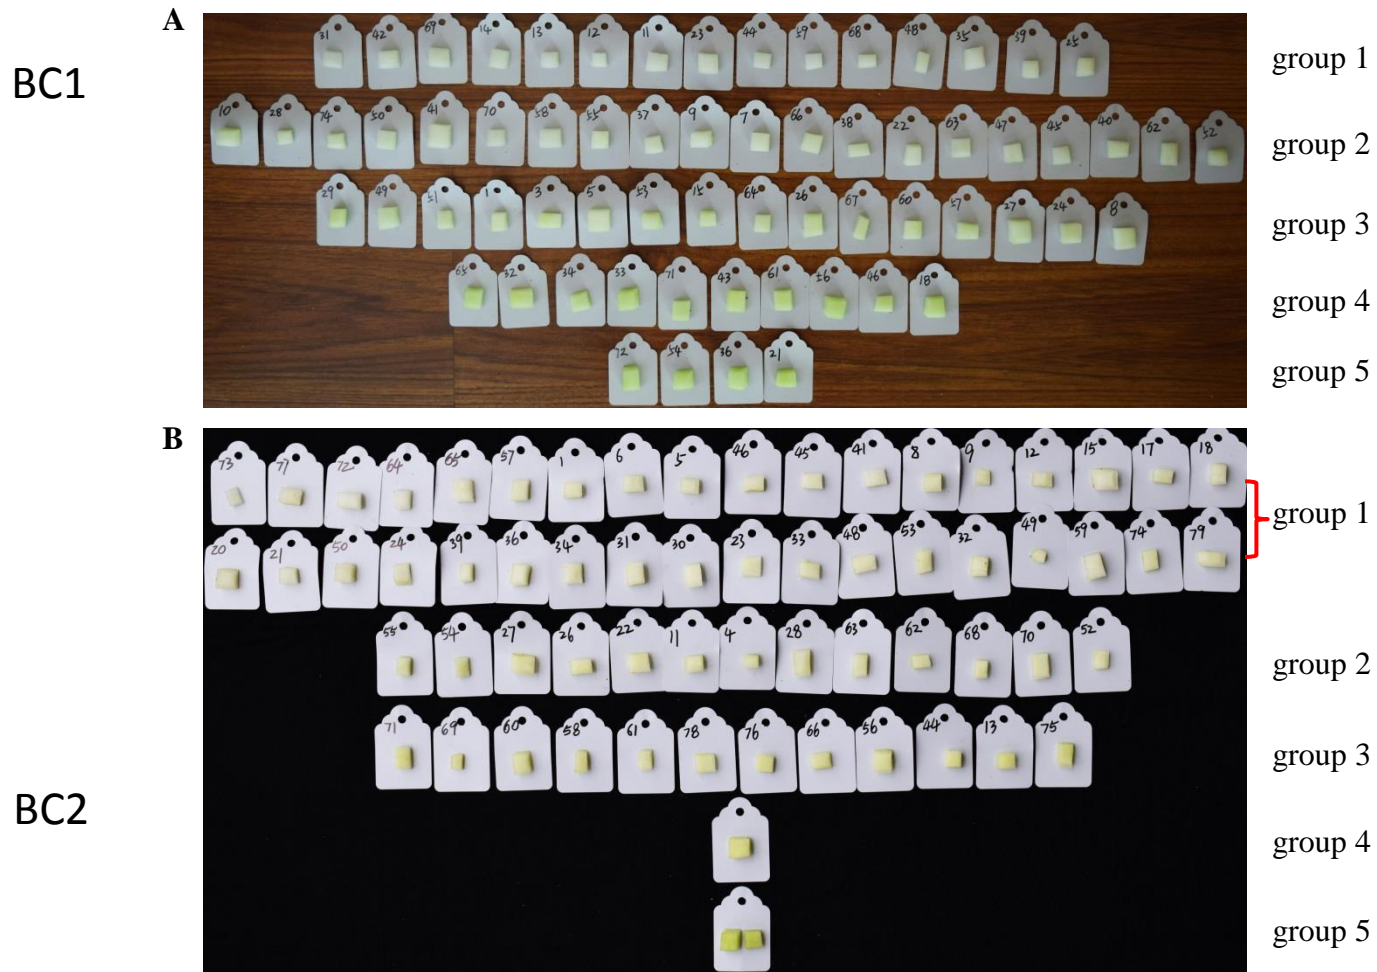

Supplementary Fig. 3

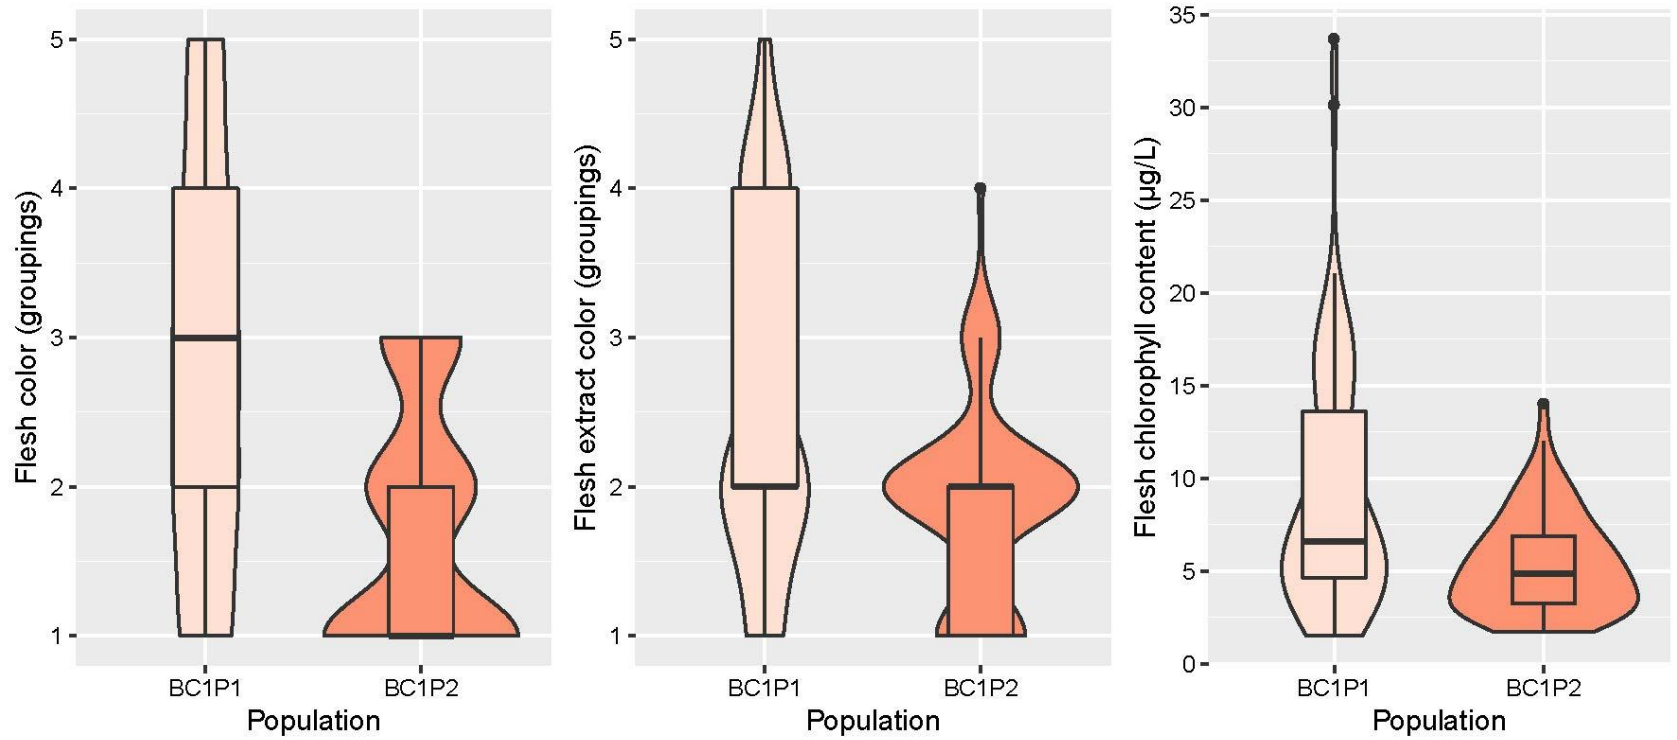

# Supplementary Fig. 4

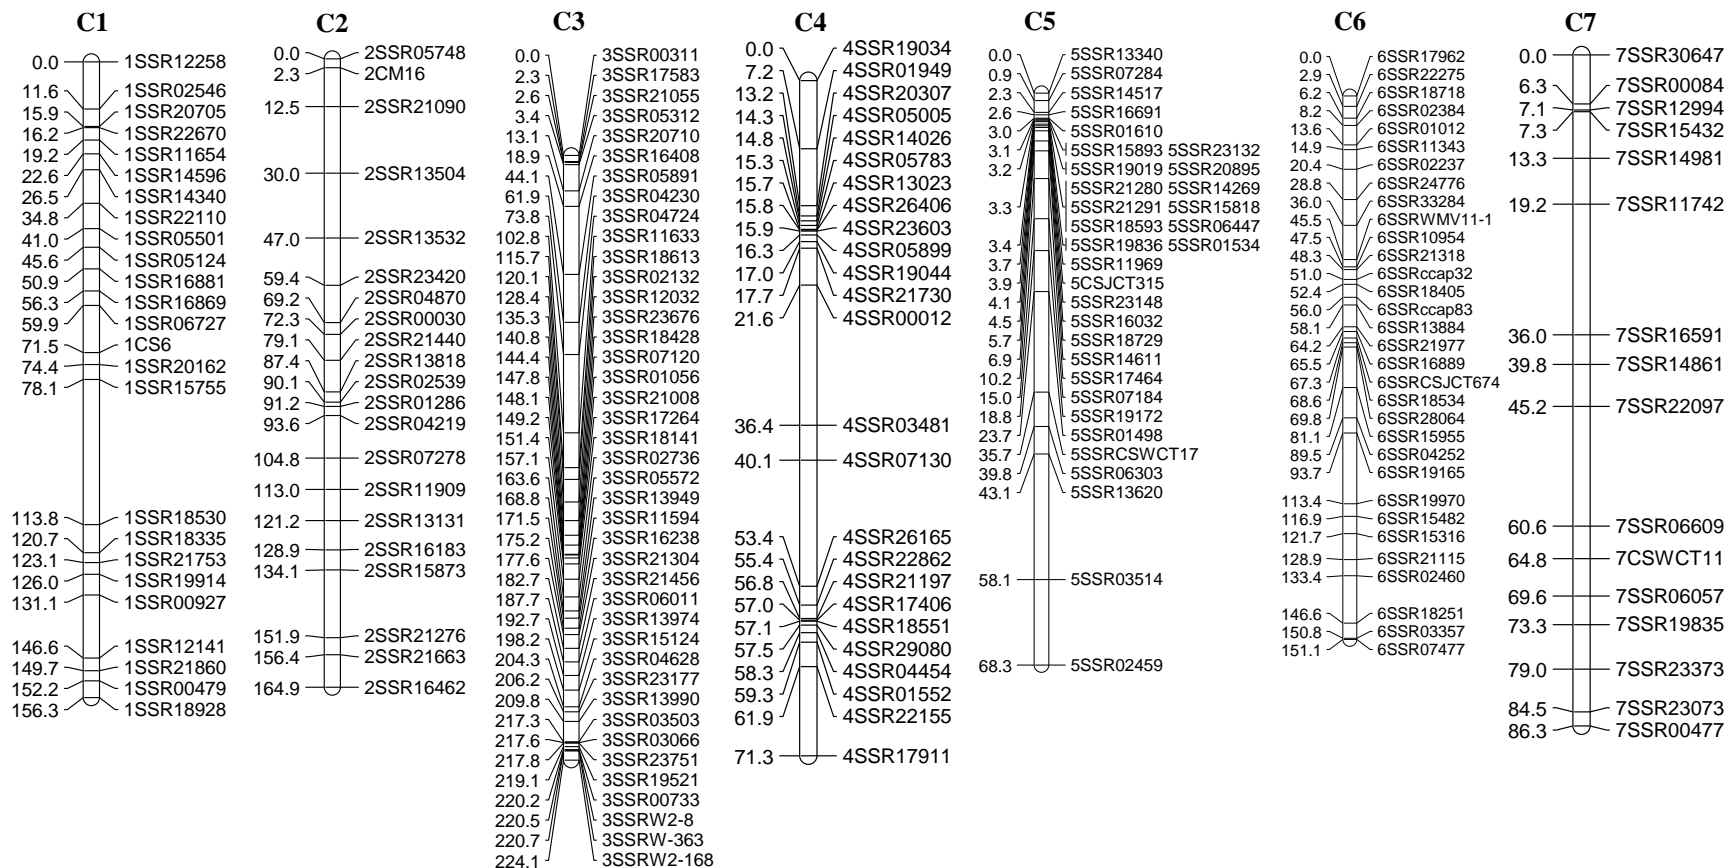

# Supplementary Fig. 5

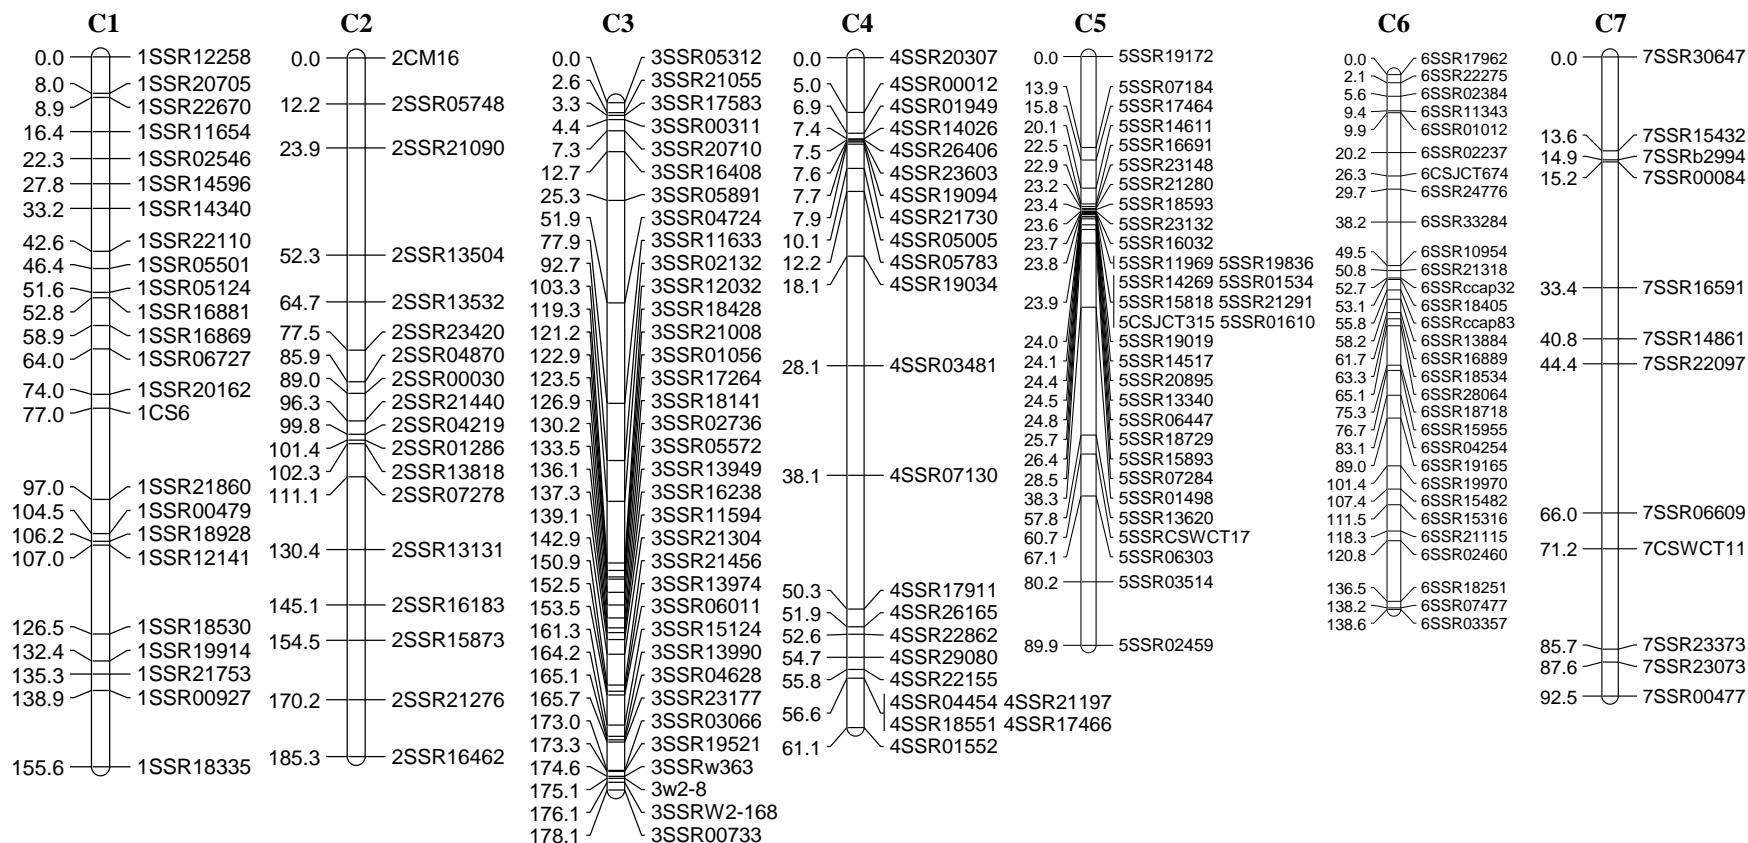

Table S1. Summary of populations used for phenotypic data collection, QTL mapping and GWAS analysis

| Populations <sup>a</sup>         | Experiments                    | Location               | Year | Season and environments | Experiment design <sup>b</sup>        |
|----------------------------------|--------------------------------|------------------------|------|-------------------------|---------------------------------------|
| 234F <sub>2</sub>                | SY2016W                        | Sanya, Hainan, China   | 2016 | Winter, screen house    | 234 individuals                       |
| 125F <sub>2</sub>                | BJ2017F                        | Nankou, Beijing, China | 2017 | Fall, plastic house     | 125 individuals                       |
| 140F <sub>2</sub>                | SY2017W                        | Sanya, Hainan, China   | 2017 | Winter, screen house    | 140 individuals                       |
| 78BC <sub>1</sub> P <sub>1</sub> | BC <sub>1</sub> P <sub>1</sub> | Sanya, Hainan, China   | 2017 | Winter, screen house    | 78 individuals                        |
| 77BC <sub>1</sub> P <sub>2</sub> | BC <sub>1</sub> P <sub>2</sub> | Sanya, Hainan, China   | 2017 | Winter, screen house    | 77 individuals                        |
| CG                               | CG2017S                        | Nankou, Beijing, China | 2017 | Spring, plastic house   | 115 lines, 3 reps, 5 plants/rep, CRBD |
|                                  | CG2017F                        | Nankou, Beijing, China | 2017 | Fall, plastic house     | 115 lines, 3 reps, 5 plants/rep, CRBD |

<sup>a</sup> 234F<sub>2</sub>: 234 F<sub>2</sub> individuals, 125F<sub>2</sub>: 125 F<sub>2</sub> individuals, 140F<sub>2</sub>: 140 F<sub>2</sub> individuals

78BC<sub>1</sub>P<sub>1</sub>: 78 BC<sub>1</sub>P<sub>1</sub> individuals, 77BC<sub>1</sub>P<sub>2</sub>: 77 BC<sub>1</sub>P<sub>2</sub> individuals

<sup>b</sup> CRBD: completely randomized block design

Table S2. Statistics of two linkage maps

| 234F <sub>2</sub> | Chromosome | Map Length (cM) | #Loci Mapped | Map Interval (cM) |
|-------------------|------------|-----------------|--------------|-------------------|
|                   | 1          | 156.3           | 25           | 6.25              |
|                   | 2          | 164.9           | 21           | 7.85              |
|                   | 3          | 224.1           | 41           | 5.47              |
|                   | 4          | 71.3            | 25           | 2.85              |
|                   | 5          | 68.3            | 32           | 2.13              |
|                   | 6          | 151.1           | 32           | 4.72              |
|                   | 7          | 86.3            | 16           | 5.39              |
|                   | Total      | 922.3           | 192          | 4.95              |

| 125F <sub>2</sub> | Chromosome | Map Length (cM) | #Loci Mapped | Map Interval (cM) |
|-------------------|------------|-----------------|--------------|-------------------|
|                   | 1          | 155.6           | 24           | 6.48              |
|                   | 2          | 185.3           | 18           | 10.29             |
|                   | 3          | 178.1           | 35           | 5.09              |
|                   | 4          | 61.1            | 23           | 2.66              |
|                   | 5          | 89.9            | 32           | 2.81              |
|                   | 6          | 138.6           | 30           | 4.62              |
|                   | 7          | 92.5            | 12           | 7.71              |
|                   | Total      | 901.1           | 174          | 5.67              |

Table S3. Information of markers mapped with 234 9110Gt×PI183967 F<sub>2</sub> population

| Chr  | Loci     | cM      | 9930 V2 position | Left primer 5' to 3'        | Right primer 5' to 3'     |
|------|----------|---------|------------------|-----------------------------|---------------------------|
| Chr1 | SSR12258 | 0       | 467457           | GGTTCAAATTTCAAAGTGTATGAAT   | GCCAAAGCTTCATAGTGAGCA     |
| Chr1 | SSR02546 | 11.637  | 3445531          | CTTCGCCTTTCTATCCTCC         | CAAACCTGATAAGTGGATTGGG    |
| Chr1 | SSR20705 | 15.857  | 2135846          | CCTTTCCTTACCCATCCCAT        | ACCCATTTGAATCAGCTTCG      |
| Chr1 | SSR22670 | 16.215  | 2310326          | TTCTCGATTGGTTAGTCGGG        | CCATACCTTTGTGTTCCATCAA    |
| Chr1 | SSR11654 | 19.221  | 2967958          | AGACCCTTTCCAGGAACCAT        | CAGAGGTGTCTAAGCTCCCCG     |
| Chr1 | SSR14596 | 22.62   | 3951558          | TTTGGCTGTGATGATTCTGG        | TGGGAAACATCGTCAAAATTA     |
| Chr1 | SSR14340 | 26.457  | 4613114          | TGACCGGAAGTATCATTTGGAG      | TCCTTTCCTTGTGAATGGAAT     |
| Chr1 | SSR22110 | 34.75   | 5270783          | TTCCCCATTCTACCCCCTAC        | GGGAAAAACAAAATGGATGAAA    |
| Chr1 | SSR05501 | 41.018  | 6038250          | GGAATTATGCAATTTGGGCA        | AACCAAACAATGCCCTAGCA      |
| Chr1 | SSR05124 | 45.617  | 6683318          | TCTTTACCAATTTTATGGTGATGTT   | AATCAAGGGTGCAAATGTCA      |
| Chr1 | SSR16881 | 50.939  | 6858338          | CCCTCTCAACATTTTCCACAA       | CGAGGAGACTTGATGGGATG      |
| Chr1 | SSR16869 | 56.336  | 7463806          | GAAAACATGAAGGCCGTTGT        | CCATTTGTCAAGTGCCTTTCA     |
| Chr1 | SSR06727 | 59.886  | 8096485          | TCGCCTCAATCACAAAATGA        | CTGCCATTGTTTTTCACTGC      |
| Chr1 | CS6      | 71.453  | 13170009         | GGAGGAGGTACATGGCTTTG        | TGAATCTGATCTTTCTACCTTCACA |
| Chr1 | SSR20162 | 74.437  | 12386750         | TGCCTTCCCATATCAAAAACA       | GGTCATTGTGAGGAAACAAAAA    |
| Chr1 | SSR15755 | 78.141  | 12462918         | GTGCCTCAGTCGGTTTTGTT        | GGGAGGGGAAGGATTCAATA      |
| Chr1 | SSR18530 | 113.806 | 18981201         | CCACAGTCCCACACAAAAG         | GGCGTTTTGTGAAGACAGATT     |
| Chr1 | SSR18335 | 120.745 | 20251684         | CACCGATTTGAGCACCTACA        | TGTCAATACAGGCAACACTCAA    |
| Chr1 | SSR21753 | 123.059 | 20714208         | GGGTGAAATGGTAATTTTGGG       | TGTGTTCAACGGGTGAGAAA      |
| Chr1 | SSR19914 | 126.007 | 21334829         | ATGGTCCACCAAACAAATGG        | GCTGTACTTGAATCACTTCCC     |
| Chr1 | SSR00927 | 131.147 | 20821600         | CTgCTgAAAaggTgTTggCT        | TggAAATgATCTAgCTgCCA      |
| Chr1 | SSR12141 | 146.574 | 26083906         | AAGCATCAGTCTCTTTTCATTTCA    | TGCAACAAAAGAAAACAGCATC    |
| Chr1 | SSR21860 | 149.695 | 27230895         | GAAGTACACATTTGAATCTTCTTTTCA | GCTTCCAAAATTGAATTGTCC     |
| Chr1 | SSR00479 | 152.151 | 7986587          | GGACGCCACGATTCTACAAG        | GGATGTTGAGTTGCAGACC       |
| Chr1 | SSR18928 | 156.336 | 26541128         | TTCAAAATGTAGAGTTTTCGGACA    | CGTGAATGAATTTGTAACCTTTC   |
| Chr2 | SSR05748 | 0       | 89863            | TGTGGCCTGTGCTAAAATGA        | TTTGAAAAGCTAAAAGCCCA      |
| Chr2 | CM16     | 2.325   | 487540           | TGCCTGTTGTGATTGAGGAG        | TTCTTCTTACCTCCGCCAAA      |
| Chr2 | SSR21090 | 12.456  | 1858848          | CTGGAAATGGGGTTGGATTA        | TGAATCAGCCGTTTCTGTGA      |
| Chr2 | SSR13504 | 30.012  | 4372184          | CATCCCTTTTCCCTTCTTCTTT      | TCCATGTGGAAGAATAACCCA     |
| Chr2 | SSR13532 | 47.041  | 5647445          | AAACCCAAGAATTGTAAACCCA      | TGATCCATTTCTATTCTAACATTGA |
| Chr2 | SSR23420 | 59.409  | 7873772          | GAAGGGATGGTAGATGAAGGG       | CTTCTCCCCTTTCTTGGCTT      |
| Chr2 | SSR04870 | 69.235  | 10118535         | TACATGCCCCCTTGAAGAAG        | TTCTTGGAGGATTTGCAGAAA     |
| Chr2 | SSR00030 | 72.291  | 10670350         | TGAAATTGCTTACCCTTTGACC      | CCATGTTTTGTAGGGATCGAG     |
| Chr2 | SSR21440 | 79.127  | 12743133         | TTGTATCAAATTTGTGCCTTAAAAGTT | TGCATGCTTATCTCCTTTTCA     |
| Chr2 | SSR13818 | 87.441  | 14974382         | TTGTTAGTTTCAATTTGAGGTGTCAAG | TCCATATTAACCTCTCAGGCTAACA |
| Chr2 | SSR02539 | 90.083  | 13768896         | AAAAATGATCAGCTCGATGAAA      | GCAAGCGCTTTCCAATCTAT      |
| Chr2 | SSR01286 | 91.192  | 14658378         | CCGAAAACCATTTGTTCAAGC       | TTTAGCTTAGTTTCCAAGCACTGA  |
| Chr2 | SSR04219 | 93.595  | 13713498         | GAGACATTTGTGGGCATTTGA       | CTCATTTTTCATCCAAAGGGC     |
| Chr2 | SSR07278 | 104.848 | 17016846         | ATCGCCATGGATTTTCATCTC       | CCACTCTTCGAGTACCGCTC      |
| Chr2 | SSR11909 | 112.955 | 17471678         | AATAATACCAGTGGCCCCATC       | AAAGCTCCCTCCTCCCCTAC      |
| Chr2 | SSR13131 | 121.188 | 18505180         | AAAGCAGAGTATGGCATGGG        | AAAAGCCAAAGAACCCAACA      |
| Chr2 | SSR16183 | 128.885 | No Hits          | GGAGAAATTTGATGGTGTAGCC      | TTGCAAATCTCTAATACTTTGCCTT |
| Chr2 | SSR15873 | 134.062 | 19269078         | GCCAAAAATCCGAGAACAGA        | TCCTGGGATTTTGATTGCT       |
| Chr2 | SSR21276 | 151.869 | 21047286         | TCGATGATAAATCCATCACATTTT    | CGCTCTTGCCTATCTTGCTT      |
| Chr2 | SSR21663 | 156.439 | 21368763         | ATCCCCATAATCCCATTTC         | AGCATTATGAATGGAGGGCA      |
| Chr2 | SSR16462 | 164.853 | 22621989         | TCACCTTCATGATTTTGCCA        | GTCTTCAACGCAACCCAAGT      |
| Chr3 | SSR00311 | 0       | No Hits          | TGAGGCAGAATCGAGAGTAGG       | TGCAAAACTTCTTCTCGAATACA   |
| Chr3 | SSR17583 | 2.26    | No Hits          | GTTGATAAAAAGAAGCCGCCA       | TCTAAGCCGCCCTTAAAACA      |
| Chr3 | SSR21055 | 2.622   | No Hits          | CATCCTCATCCACCCAATCT        | TCCAAACAAGTCTGACAAGGAA    |
| Chr3 | SSR05312 | 3.432   | 2368898          | GCCATGGAAAAGGTTTGTAGT       | TCAATTATGCCCTTATCCC       |
| Chr3 | SSR20710 | 13.05   | 3610715          | TAGAAGAAGCATCGGCAGGT        | GAACTGGGGGTTTACCAGAA      |
| Chr3 | SSR16408 | 18.877  | 5630730          | GTTGAATTATTGGAGGGATTTTT     | CATTAATTTATTCAACCGTTTGGT  |
| Chr3 | SSR05891 | 44.129  | No Hits          | GTTTGGGTATAGGGAGACCG        | TGAGATGTGAGAACTCCATACA    |
| Chr3 | SSR04230 | 61.894  | 9944424          | CCGTACGATCCTTCCACATT        | CAAGGAGGACCCATCATTGT      |
| Chr3 | SSR04724 | 73.824  | 11217547         | CTTTTCGCATTTCTTGACCA        | CCACATTTCTAAGACCATGGTAGA  |
| Chr3 | SSR11633 | 102.779 | 15920930         | AATGAGATAACATATGGATTTGTATGA | CACCGAACTGAAGTGTGCAG      |
| Chr3 | SSR18613 | 115.653 | 19918371         | CCACATAAAACAGCAAGGCA        | TGTTGGTTGGTTGACTAGCATT    |
| Chr3 | SSR02132 | 120.068 | 20792964         | CAATTGGTATGAGTGAAAGATAAGC   | CTCTGGTCCACCCAATCCT       |



|      |           |         |          |                            |                           |
|------|-----------|---------|----------|----------------------------|---------------------------|
| Chr3 | SSR12032  | 128.383 | 23296186 | GGGGGTTTGAATTGAATGTG       | CTCTTCTTTCCCCCTTTGCT      |
| Chr3 | SSR23676  | 135.326 | 25442405 | TCCACTTTTGTCTCTCCTCA       | CAAAGTAATAGTGTGCTGTGAAAGA |
| Chr3 | SSR18428  | 140.772 | 26417833 | CCATTCACCTTCTTTCCAGC       | TGGTTTCAAGACCACCTCT       |
| Chr3 | SSR07120  | 144.442 | No Hits  | GATCAAAAAGATCCAATAAATACCA  | TCGTCCAAATAGTTGTTCTTACCA  |
| Chr3 | SSR01056  | 147.762 | No Hits  | AAAgggAAAggTAAATTgCCA      | AgCAgTTCggATgATATTggA     |
| Chr3 | SSR21008  | 148.091 | No Hits  | TTGTCCACCTTGATGTGAA        | CCCCTTTTCCCTTTAACC        |
| Chr3 | SSR17264  | 149.177 | 27811206 | CCCTCCCACCTTCACTATCA       | ATTGTCAACAAGAAACAGTGTGA   |
| Chr3 | SSR18141  | 151.421 | 28666375 | ATGTCAATATGTGGGACCCG       | TCGTAATAAATGGATGGCCC      |
| Chr3 | SSR02736  | 157.142 | No Hits  | ATGGGTGTGTTAGAAAAGATTAGGA  | CCAATTGATTTGGATTGGACA     |
| Chr3 | SSR05572  | 163.639 | No Hits  | GCAAACCATAAGTTTCCCCA       | GATCGATATTGCAACGAATTACA   |
| Chr3 | SSR13949  | 168.822 | No Hits  | CCCATCAATCCCAGTTCATC       | GTGCTGTTGCCATAAACCTT      |
| Chr3 | SSR11594  | 171.48  | 31068516 | GGCGAAAGATGAACAGAAGC       | CCATGTTTTCGGTTTCCTTC      |
| Chr3 | SSR16238  | 175.182 | 31163143 | TCCGGATCTTACCAAATGAA       | TCAGAGCATAAAACCAGTGTGT    |
| Chr3 | SSR21304  | 177.558 | No Hits  | CCTCACCATGGTATTATCAATCG    | GAATTCTTCTCGAATGTTTCCAA   |
| Chr3 | SSR21456  | 182.67  | No Hits  | AAGTGGGAAGGTTTGGAGGT       | TTCTTTTTCCCCCTTCATT       |
| Chr3 | SSR06011  | 187.736 | No Hits  | AGGGTCCAACCTCAAACCTCAA     | GCCCACCCTTAACATCTTACC     |
| Chr3 | SSR13974  | 192.712 | 32586332 | ATGGAGTGCAAGCAAGCAA        | ATTGGGATTAGCAGCTTCCC      |
| Chr3 | SSR15124  | 198.227 | No Hits  | TCCACCCAATCTTTCCACTC       | AGTGCTCTTCACATTTGCCA      |
| Chr3 | SSR04628  | 204.331 | No Hits  | CCAACTTTTCGTAATGATTGAGAG   | GTGAGCGTCAGAGCAATTCA      |
| Chr3 | SSR23177  | 206.199 | No Hits  | TGGATGAATGATGCCACAGT       | CAAAGCCTGTCTTGGTAAAAA     |
| Chr3 | SSR13990  | 209.772 | No Hits  | CCAAATGCGGTGAAAAAGAT       | GGGATTCTCTTACCCCCAA       |
| Chr3 | SSR03503  | 217.261 | No Hits  | AACAGGCCTCAGAAGCAATG       | CCCAGGTTTGAGTTCCATCA      |
| Chr3 | SSR03066  | 217.631 | 37239584 | CAAAACTTAAGGACCGAAAGGA     | ACATGGTTGGTTAGTGGCCT      |
| Chr3 | SSR23751  | 217.842 | 37093817 | CATCCCCATCCCTTTCTTTT       | ACGTGGAGGGATAAACGTGA      |
| Chr3 | SSR19521  | 219.138 | No Hits  | CAACCACACACAAATTCCCA       | ATATGCCGCCCTAGAAAACA      |
| Chr3 | SSR00733  | 220.231 | No Hits  | TCAAATTGTGATAGAGAGGCAGA    | CCTCACAACCAAAAGGTCAAA     |
| Chr3 | SSRW2-8   | 220.47  | No Hits  | gAACCCAAATTggCATTAggT      | gCATgTCTCTCTCCCTCAgC      |
| Chr3 | SSRW-363  | 220.652 | 38975987 | TGCCTTCTTCTTTCCCTTCA       | CCAAACAACACCATCAGAAACA    |
| Chr3 | SSRW2-168 | 224.093 | 39694820 | TGTCTTCCCATTCAATCGT        | CCACAGTTTGTGCATCCAAG      |
| Chr4 | SSR19034  | 0       | 2972019  | TCTTGCTTATCCCACCGTTC       | GGGTTTCAAACATTAACCCA      |
| Chr4 | SSR01949  | 7.249   | 823261   | AGGAAAACCGGAAGCAGAAT       | TCCACAGAACAACCGTGAAA      |
| Chr4 | SSR20307  | 13.197  | No Hits  | CCAAAAGGTCATTCCGGTTCA      | CGAAAAGTCAAGAAGAAACACAA   |
| Chr4 | SSR05005  | 14.252  | 10542520 | CAGATTTAGCCAGTGGGTCC       | ATCAGGGATCAGTCAATGGC      |
| Chr4 | SSR14026  | 14.799  | No Hits  | TACCGGAGAAATCATCGAGC       | TCGCTAAACTCCAACACGAA      |
| Chr4 | SSR05783  | 15.304  | 3363484  | AAAAGTCCCACAACATATGGAAA    | TGGACAAACCAAGTCCCCT       |
| Chr4 | SSR13023  | 15.714  | 4471539  | GTGGGGAGTGGCATAATTCAG      | AACCCGGCAGGATAAATTTT      |
| Chr4 | SSR26406  | 15.757  | 5276352  | AGCACACTTGGGTGGATTTC       | CCTTTTCATTTGCAAACCTCC     |
| Chr4 | SSR23603  | 15.89   | 5973993  | GACCATTTACCTTGCCATTTT      | GAAAGCGAGCTAGGGCTTTT      |
| Chr4 | SSR05899  | 16.285  | 4790192  | TAAGAGCAAAAATCCCACGC       | AGCTCAATCAACGTCAAGAGAA    |
| Chr4 | SSR19044  | 17.041  | No hits  | TgAAAAgAACATATggggCA       | TgCAAACATAACAATTCgATCC    |
| Chr4 | SSR21730  | 17.669  | No Hits  | TTTTGTGCTGCTGATGAAGC       | TTCTCATCGCAGGTGAAGTG      |
| Chr4 | SSR00012  | 21.63   | No Hits  | TCTCACCATGGTCACCTAATG      | GGTCATTGAAGAGTCAAGTTGG    |
| Chr4 | SSR03481  | 36.426  | 12971131 | TGTCTGTCTTTTCCCTCTCT       | AGAAACATGGTATGATATGTTGGA  |
| Chr4 | SSR07130  | 40.142  | No Hits  | CCACACACACACACAGTCACA      | TCCCATTGTCCCTCACTCTC      |
| Chr4 | SSR26165  | 53.448  | No Hits  | TCTTTTGTGGTGAATAATTGAAA    | CCTTCTCATGTGTATTGTCTTTTG  |
| Chr4 | SSR22862  | 55.425  | No hits  | AATTGGGTCAAAGAAAGGGG       | TCGTCAAAATGAATCTCCGA      |
| Chr4 | SSR21197  | 56.801  | 23134766 | AAACCATTGGTATTGGCGA        | GTCCAACCAACCAAGCCTA       |
| Chr4 | SSR17406  | 56.997  | No hits  | GAGCCATCCATCAGAGAGAGA      | ACCCACAAGCTTCAGAGGTC      |
| Chr4 | SSR18551  | 57.103  | 21268560 | GATGTGCATGTGATCCAACAG      | TGAATCTACTTGGGTTCTGTTGT   |
| Chr4 | SSR29080  | 57.513  | No Hits  | TTTTGCAATCAACCATTTTCC      | GCCCATTTCCAATATATCCC      |
| Chr4 | SSR04454  | 58.328  | 16371689 | GGAAAGTGTGTGTTGCTCTTG      | GATCCATTTGATGCATTGCT      |
| Chr4 | SSR01552  | 59.269  | No hits  | CACGACTTGCCATTAACCTT       | CCCAAACCTTTCCCTCAAAT      |
| Chr4 | SSR22155  | 61.935  | 22948132 | AAACGGACATGTTAGGTGGC       | TGGATTATTTAGGACAAACTGCAA  |
| Chr4 | SSR17911  | 71.265  | No hits  | TGGAAGAGTGAGAAATGGGC       | TGGGAGAAACGTTCTTTATTTTT   |
| Chr5 | SSR13340  | 0       | No hits  | GCTTTACATGGCTTCTCCCA       | TTTTCTTGGCGACGATTAG       |
| Chr5 | SSR07284  | 0.87    | No hits  | CTGCAGAATGTTTTGAGGCA       | CCAACCTTGGAGGTGTTGAT      |
| Chr5 | SSR14517  | 2.276   | 9375222  | TCCCCATATGTTCTTCTCGC       | AAGCTAAGGCAAACCAACCA      |
| Chr5 | SSR16691  | 2.604   | 9141668  | CATGTTGAGTGGAAAAATTGAAA    | TTCGTACATTGTCAAATGCG      |
| Chr5 | SSR01610  | 2.979   | No hits  | TGGTTGATATAGAAGGAAGATGTTGA | CCCTTTGAACGAAATCCAAA      |
| Chr5 | SSR15893  | 3.09    | No hits  | ATGGGAGCTACACGTTGAGG       | ATAGGCTTCCATTCCAGGGT      |
| Chr5 | SSR23132  | 3.149   | 15531345 | GCCCTATCACTTCTTTGTTTTCA    | CAAGAAATGGGGTGGAAAGAA     |

|      |           |         |          |                             |                            |
|------|-----------|---------|----------|-----------------------------|----------------------------|
| Chr5 | SSR19019  | 3.214   | No hits  | AgCTAgCTgCACCCACAAC         | AAAgTATCCggAATCTTgTCAATC   |
| Chr5 | SSR20895  | 3.218   | No hits  | CCTCTTCTCCTCTTCCTCC         | CCTTCCCCAATGTAGCAAAG       |
| Chr5 | SSR21280  | 3.253   | 7486163  | CCATGATTTCAAATACCCCTT       | TCTGTTTTCAAATTTGTTCCGA     |
| Chr5 | SSR14269  | 3.27    | 13002103 | GGAAATGGGAGATACACGGA        | GCACTTTCAGTTCATGCT         |
| Chr5 | SSR21291  | 3.273   | 16273295 | CACTCCACAAGCAAACAAA         | CTATGGCGGAGAAGGAGTTG       |
| Chr5 | SSR15818  | 3.281   | 18966224 | GGACATGTCAACTCCCCTGT        | GCCTCTAGCCTGAAAGACCA       |
| Chr5 | SSR18593  | 3.321   | 129876   | TGGGCCTCAATCCTTGCTA         | ATAAGGTGTGTGGCCAAAG        |
| Chr5 | SSR06447  | 3.332   | 8580058  | AAGTATGACGACACCCTTCG        | CGCAAAACCGAAAGGTACATA      |
| Chr5 | SSR19836  | 3.419   | No hits  | TGCAGAAACATGAAAAGGGA        | TGATTGAGTCCCATATGCC        |
| Chr5 | SSR01534  | 3.446   | No hits  | CTTCTGCTTCCGCTTCCTTA        | GGAAGAAACCCACCAGAACA       |
| Chr5 | SSR11969  | 3.673   | 5973902  | GGGTCATACCCAAAAGGGAG        | TGCTTTAGCCGACAACCTCAA      |
| Chr5 | CSJCT315  | 3.922   | No hits  | CCACgAAATACAgATCAgCAAC      | CACgTTACATTggACgAgAgAT     |
| Chr5 | SSR23148  | 4.081   | 16426691 | TGCCGTTTGGATCACATAGA        | CAATACGCACAAAAAGCGAA       |
| Chr5 | SSR16032  | 4.512   | No hits  | TCATGTCATCAATCACACCTTC      | TTTTATCTTTTGTGCGAGACTTGT   |
| Chr5 | SSR18729  | 5.708   | 13006047 | TCCAATCCCCTCTGGTTTC         | TCTTTCCAACACTAACCTTGGATT   |
| Chr5 | SSR14611  | 6.886   | No hits  | ATTTGGCTTCCAGGTTGATG        | GAATCGAAAACCGATGAGGA       |
| Chr5 | SSR17464  | 10.205  | 21187949 | ATCTCAGCCCTTGGATCCTT        | TCTTCGAGAAATGGGATTTTG      |
| Chr5 | SSR07184  | 15      | No hits  | CACCATTTTCCACAAAACGA        | GCCATACCCTTCAACATAGGA      |
| Chr5 | SSR19172  | 18.828  | 22085961 | CGAGGAGAAGGACTACGACG        | CGTGTGGAGCTTTCTCACA        |
| Chr5 | SSR01498  | 23.738  | 22655145 | GGCGCCACAAATATTCACA         | CCACAAACGTAAAGAGATTCACA    |
| Chr5 | SSRCSWCT  | 35.735  | No hits  | TTgAATTATgggTTCATTTTT       | gACAATgATAAACTTCCCTgA      |
| Chr5 | SSR06303  | 39.796  | 24878262 | AGCTCTCAACAACGAAGGGA        | TGACTTTCTTGATGGTACCGC      |
| Chr5 | SSR13620  | 43.083  | 24082650 | TTTTCCGGTTCTACAATGGC        | AGTTCAATCTTGTATGAGTGATTTGA |
| Chr5 | SSR03514  | 58.057  | 26718521 | TAGGGTCCCTTCCCTCATA         | GGGTACCCAAAAGCAAGTGA       |
| Chr5 | SSR02459  | 68.342  | 27816197 | TCGGAAGATGGGTTATTTGG        | TGACCCCTCACATTCTCTCC       |
| Chr6 | SSR17962  | 0       | 776867   | CAAAAGAAAAGCGCAAAAGG        | GTCCCCTCCCAAAAACAGA        |
| Chr6 | SSR22275  | 2.884   | 1016060  | ATACTTCGCCATTGACGCTT        | TTACTAGGCGTTGTGGGAGC       |
| Chr6 | SSR18718  | 6.173   | 1611048  | TGAAGCAAAGTAACCCCAACA       | CACAAATGGATTACAGAGCGAA     |
| Chr6 | SSR02384  | 8.238   | 2783756  | AAAAATCCGACAAATCGTGC        | GGTCAAATGTTGCCTTTTGC       |
| Chr6 | SSR01012  | 13.621  | 3855950  | TCCAAAAATCGCGACCTAAA        | GTGAGCCGTTGATTTCTCGT       |
| Chr6 | SSR11343  | 14.943  | 4133077  | GTGGGGTTGCTTTTGGATAA        | CAATGGTTGCTTTGCTTCAA       |
| Chr6 | SSR02237  | 20.389  | 5124994  | CTGAAAACCTGGGGAATGGAA       | GTTTGTGCTCGAAAAGGA         |
| Chr6 | SSR24776  | 28.82   | 5812826  | GTTCTTGGTGCCATTGTTT         | TCCAATCCCCTCTCTCTCG        |
| Chr6 | SSR33284  | 35.975  | 6610818  | TGGGAAATGGATAATTTGGTG       | GGCATCCATCATTTCTTTGG       |
| Chr6 | SSRWV11   | 45.543  | 9025951  | ACAAAGCTTCTCCGCAAATG        | GGAGGGAAAGGAAGGAGAGA       |
| Chr6 | SSR10954  | 47.503  | 9453905  | TGCAAAACCAATTATTTGATATAGAGA | TTTCGGCAAAAGAACTAGGAG      |
| Chr6 | SSR21318  | 48.268  | 9372844  | GACACCCCATTCCTCATCAT        | GCTTCATCACTCCCAATTGAG      |
| Chr6 | SSRccap32 | 50.968  | 9764418  | CGATCGTATTGATTAGATAAGCG     | CGATTTCGTCATTTTCTTTCTC     |
| Chr6 | SSR18405  | 52.359  | 10051003 | CGCAGGTGCATCTCATGTAA        | GACAAACAAGGGGACGAAAA       |
| Chr6 | SSRccap83 | 55.989  | No hits  | CgTgAACCTCCgATCTCATT        | AgTCAAAGTTggCCAgTCgT       |
| Chr6 | SSR13884  | 58.08   | 11069339 | GGATAATCCTGATTCTCTGTGG      | TGTGCAACTGAAAACGAAGC       |
| Chr6 | SSR21977  | 64.185  | No hits  | ggTgTACCgCATAATCCACA        | TTCATCCAACTTTTATTgCATCT    |
| Chr6 | SSR16889  | 65.47   | 14857891 | TCACATATTGGAATTTGAGGACA     | AAGAGCAAACATTTGTTGAAACTC   |
| Chr6 | SSRCSJCT6 | 67.291  | No hits  | TAgAAAaggAAgggATgTgATTAgg   | ACAggTggTTAgAggTTAgAgCTg   |
| Chr6 | SSR18534  | 68.611  | 16606287 | GCCCTGAAACTGAAGCTGAG        | CTGATTGCCAAAGTCAAGCC       |
| Chr6 | SSR28064  | 69.752  | 16465180 | GAAATTAATTAAGATCAAGAAAGGGA  | ATCACTTGCATCACGTCTGG       |
| Chr6 | SSR15955  | 81.11   | 18995075 | TTTGAGCCTTGAGGCAAAGT        | GCAATTCAACGTAATGGGCT       |
| Chr6 | SSR04252  | 89.507  | 20075416 | AAAGAACACACATGGTGGTGG       | AAGGAGTGTGTAATAGGCCG       |
| Chr6 | SSR19165  | 93.738  | 21344610 | AATCCACGTTGGTTGTCGTT        | GAAGGGCCAAAAATGTTTCA       |
| Chr6 | SSR19970  | 113.357 | 23339816 | TACCCGTAATCTTCCCCTC         | CAACAGAAGCAAAGTAGGTGGA     |
| Chr6 | SSR15482  | 116.944 | 24003956 | AAAAACAGCAGGGCAGAAGA        | GTTGAGCTGTCTATGGGGGA       |
| Chr6 | SSR15316  | 121.667 | 24577348 | TCCAATTTTCTGGCGAAGAC        | CAACCGAAACAACGTCTCCT       |
| Chr6 | SSR21115  | 128.901 | 25689547 | GCAGCAGTCACCCAACCTAT        | CACTGTGAACATATGGGAAGGA     |
| Chr6 | SSR02460  | 133.443 | 26252541 | CTCAGAAACCCCTCCACCAA        | CTGTACCCGCGAGGACAGTTT      |
| Chr6 | SSR18251  | 146.586 | 28192598 | AAATGGCAAATAATGCATGG        | GAGACAGCCACAGAGATTTGG      |
| Chr6 | SSR03357  | 150.759 | 28813523 | AAAAGGGCAAGTCAAAACCC        | GGGGAGGAAGAGAGACCCTT       |
| Chr6 | SSR07477  | 151.115 | 29009111 | CGTTTCATTTCATTGCTGCAC       | GCCCAGATTTGGTCATTTCTT      |
| Chr7 | SSR30647  | 0       | 448536   | GAAATGAGAGCAAGTTGCAAAA      | AGGCGTAAATCTGACCGTTG       |
| Chr7 | SSR00084  | 6.298   | 40139    | AAGTGTGACGATGTCGTTTCG       | AAACGTCAGCCACACCTTTC       |
| Chr7 | SSR12994  | 7.084   | 2869178  | TCATCCTGCAATGCAAAGAC        | ACCGTGGATCTTAAGCCAGA       |
| Chr7 | SSR15432  | 7.275   | 4372675  | TGAGAAATTGGATGTGCGAAA       | TTAGTTCATTGACATGGGATGAT    |

|      |          |        |          |                         |                         |
|------|----------|--------|----------|-------------------------|-------------------------|
| Chr7 | SSR14981 | 13.311 | 6577201  | GAGTGCTTGGAGTTGGGTGT    | GAGTGGGAATGAGGAGGTGA    |
| Chr7 | SSR11742 | 19.19  | 9462250  | GCTATCCCCAAGGATGATGA    | AGCTTGGCTTCGTCTTTTGA    |
| Chr7 | SSR16591 | 36.039 | 12291486 | TTTTGGGTAGAAATCAAGAAACG | GGGAATCAAACATTCATGGC    |
| Chr7 | SSR14861 | 39.756 | 12975963 | ATTTCTTCCCCACCAAAAC     | ATGAATCCTCCTCCCAGAGC    |
| Chr7 | SSR22097 | 45.171 | 13483521 | ACGGTCATCCGAATTCTCAG    | CAACAAACGATCCAACATCG    |
| Chr7 | SSR06609 | 60.601 | 15169712 | TCTAATGGAAACCCTCTCCG    | GAGACGGAATCGGAATCAAA    |
| Chr7 | CSWCT11  | 64.823 | No hits  | ATAGGCAATATGGCTTCT      | CACTTCAATGGAGTTTCG      |
| Chr7 | SSR06057 | 69.647 | 16098193 | GTTCGTGACTCACCAGACCC    | TCCTGAATTTTGGGAATTGG    |
| Chr7 | SSR19835 | 73.286 | 16698722 | CAAGCCTTGAATGGTTAAATACA | AAAGACTTGGTTGATCACTTTCA |
| Chr7 | SSR23373 | 78.983 | 17467963 | CCCACCATGCAAAACTCTTT    | GTCTTTGCGCACCTCTCACT    |
| Chr7 | SSR23073 | 84.494 | 18153573 | ATGAGGGAAGACTTTGGGGT    | TTTCGTGAAGAAGGGGAAGA    |
| Chr7 | SSR00477 | 86.271 | 19197072 | TATTGCGATGGTTTGACGTG    | GCAAATCCGGAGTTCGTTA     |

---

Table S4. Information of markers mapped with 125 9110Gt×PI183967 F<sub>2</sub> population

| Chr  | Loci     | cM      | 9930 V2 position | Left primer 5' to 3'        | Right primer 5' to 3'       |
|------|----------|---------|------------------|-----------------------------|-----------------------------|
| Chr1 | SSR12258 | 0       | 467457           | GGTTCAAATTTCAAAGTGTATGAAT   | GCCAAAGCTTCATAGTGAGCA       |
| Chr1 | SSR20705 | 7.998   | 2135846          | CCTTTCCTTACCCATCCCAT        | ACCCATTTGAATCAGCTTCG        |
| Chr1 | SSR22670 | 8.91    | 2310326          | TTCTCGATTGGTTAGTCGGG        | CCATACCTTTGTGTTCCATCAA      |
| Chr1 | SSR11654 | 16.356  | 2967958          | AGACCCTTTCAGGAACCAT         | CAGAGGTGTCTAAGCTCCCC        |
| Chr1 | SSR02546 | 22.315  | 3445531          | CTTCGCCTTTCCTATCCTCC        | CAAACCTGATAAGTGGATTGGG      |
| Chr1 | SSR14596 | 27.786  | 3951558          | TTTGGCTGTGATGATTCTGG        | TGGGAAACATCGTCAAATA         |
| Chr1 | SSR14340 | 33.152  | 4613114          | TGACCGGAAGTATCATTGGAG       | TCCTTTCCTTGTGAATGGAAT       |
| Chr1 | SSR22110 | 42.641  | 5270783          | TTCCCCATTTACCCCCTAC         | GGGAAAAACAAAATGGATGAAA      |
| Chr1 | SSR05501 | 46.399  | 6038250          | GGAATTATGCAATTTGGGCA        | AACCAAACAATGCCCTAGCA        |
| Chr1 | SSR05124 | 51.559  | 6683318          | TCTTTACCAATTTTATGGTGATGTT   | AATCAAGGGTGCAAATGTCA        |
| Chr1 | SSR16881 | 52.754  | 6858338          | CCCTCTCAACATTTCCACAA        | CGAGGAGACTTGATGGGATG        |
| Chr1 | SSR16869 | 58.936  | 7463806          | GAAAACATGAAGGCCGTTGT        | CCATTTGTCAGTGCCTTTCA        |
| Chr1 | SSR06727 | 64.009  | 8096485          | TCGCCTCAATCACAAAATGA        | CTGCCATTGTTTTTCACTGC        |
| Chr1 | SSR20162 | 74.037  | 12386750         | TGCCTTCCCATATCAAACA         | GGTCATTGTCAGGAAACAAAA       |
| Chr1 | CS6      | 77.003  | 13170009         | GGAGGAGGTACATGGCTTTG        | TGAATCTGATCTTTCTACCTTACA    |
| Chr1 | SSR21860 | 96.979  | 27230895         | GAAGTACACATTTGAATCTTCTTTTCA | GCTTCCAAAATTGAATTGTCC       |
| Chr1 | SSR00479 | 104.505 | 7986587          | GGACGCCACGATTCTACAAG        | GGATGTTTCGAGTTGCAGACC       |
| Chr1 | SSR18928 | 106.244 | 26541128         | TTCAAAATGTAGAGTTTTCGGACA    | CGTGAATGAATTTGTAACCTTTC     |
| Chr1 | SSR12141 | 107.021 | 26083906         | AAGCATCAGTCTCTTTTCATTTC     | TGCAACAAAGAAAACAGCATC       |
| Chr1 | SSR18530 | 126.499 | 18981201         | CCACAGTCCCACACACAAAAG       | GGCGTTTTGTGAAGACAGATT       |
| Chr1 | SSR19914 | 132.445 | 21334829         | ATGGTCCACCAAACAAATGG        | GCTGTACTTGGAACTACTTCCC      |
| Chr1 | SSR21753 | 135.303 | 20714208         | GGGTGAAATGGTAATTTGGG        | TGIGTTCAACGGGTGAGAAA        |
| Chr1 | SSR00927 | 138.913 | 20821600         | CTgCTgAAAAggTgTTggCT        | TggAAATgATCTAgCTgCCA        |
| Chr1 | SSR18335 | 155.618 | 20251684         | CACCGATTTGAGCACCTACA        | TGTCATACAGGCAACACTCAA       |
| Chr2 | CM16     | 0       | 487540           | TGCCTGTTGTGATTGAGGAG        | TTCTTCTTACCTCCGCCAAA        |
| Chr2 | SSR05748 | 12.195  | 89863            | TGTGGCCTGTGCTAAAATGA        | TTTGAAAAGCTAAAGCCCA         |
| Chr2 | SSR21090 | 23.865  | 1858848          | CTGGAAATGGGGTTGGATTA        | TGAATCAGCCGTTTCTGTGA        |
| Chr2 | SSR13504 | 52.278  | 4372184          | CATCCCTTTCCCTTCTTCTTT       | TCCATGTGGAAGAATAACCCA       |
| Chr2 | SSR13532 | 64.737  | 5647445          | AAACCCAAGAATTGTAAACCCA      | TGATCCATTTCTATTCTAATATTGA   |
| Chr2 | SSR23420 | 77.51   | 7873772          | GAAGGGATGGTAGATGAAGGG       | CTTCTCCCCTTTCTTGGCTT        |
| Chr2 | SSR04870 | 85.912  | 10118535         | TACATGCCCCCTTGAAGAAG        | TTCTTGGAGGATTTGCAGAAA       |
| Chr2 | SSR00030 | 89.002  | 10670350         | TGAAATTGCTTACCCTTTGACC      | CCATGTTTTGTAGGGATCGAG       |
| Chr2 | SSR21440 | 96.282  | 12743133         | TTGTATCAAATTTGTGCCTTAAAGTT  | TGCATGCTTATCTCCTTTTCA       |
| Chr2 | SSR04219 | 99.755  | 13713498         | GAGACATTGTGGGCATTTGA        | CTCATTTTTCATCCAAAGGGC       |
| Chr2 | SSR01286 | 101.394 | 14658378         | CCGAAAACCATTGTTCAAGC        | TTTAGCTTAGTTTCCAAGCACTGA    |
| Chr2 | SSR13818 | 102.311 | 14974382         | TTGTTAGTTTCATTTGAGGTGTCAAAG | TCCATATTAACCTCTCTCAGGCTAACA |
| Chr2 | SSR07278 | 111.088 | 17016846         | ATCGCCATGGATTTTCATCTC       | CCACTCTTCGAGTACCGCTC        |
| Chr2 | SSR13131 | 130.428 | 18505180         | AAAGCAGAGTATGGCATGGG        | AAAAGCCAAGAACCCAACA         |
| Chr2 | SSR16183 | 145.138 | No Hits          | GGAGAAATTTGATGGTGTAGCC      | TTGCAAATCTCTAATACTTTGCCTT   |
| Chr2 | SSR15873 | 154.491 | 19269078         | GCCAAAATCCGAGAACAGA         | TCCTGGGATTTTGATTTGCT        |
| Chr2 | SSR21276 | 170.2   | 21047286         | TCGATGATAAATCCATCACATTTT    | CGCTCTTGCCATCTTGCTT         |
| Chr2 | SSR16462 | 185.348 | 22621989         | TCACCTTCATGATTTTGCCA        | GTCTTCAACGCAACCCAAGT        |
| Chr3 | SSR05312 | 0       | 2368898          | GCCATGGAAAAGGTTTGTAGT       | TCAATTATGCCCTTATCCC         |
| Chr3 | SSR21055 | 2.584   | No Hits          | CATCCTCATCCACCCAATCT        | TCCAAACAAGTCTGACAAGGAA      |
| Chr3 | SSR17583 | 3.331   | No Hits          | GTTGATAAAAAGAAGCCGCCA       | TCTAAGCCGCCCTTAAAACA        |
| Chr3 | SSR00311 | 4.44    | No Hits          | TGAGGCAGAATCGAGAGTAGG       | TGCAAACTTCTTCTCGAATACA      |
| Chr3 | SSR20710 | 7.272   | 3610715          | TAGAAGAAGCATCGGCAGGT        | GAAGTGGGGTTTACCAGAA         |
| Chr3 | SSR16408 | 12.714  | 5630730          | GTTGAATTATTGGAGGGATTTTT     | CATTAATTTATTCAACCGTTTGGT    |
| Chr3 | SSR05891 | 25.315  | No Hits          | GTTTGGGTATAGGGAGACCG        | TGAGATGTCGAGAACTCCATACA     |
| Chr3 | SSR04724 | 51.942  | 11217547         | CTTTTCGCATTTCTTGACCA        | CCACATTTCTAAGACCATGGTAGA    |
| Chr3 | SSR11633 | 77.851  | 15920930         | AATGAGATAACATATGGATTTGTATGA | CACCGAACTGAAGTGTGCAG        |
| Chr3 | SSR02132 | 92.656  | 20792964         | CAATTGGTATGAGTGAAAGATAAGC   | CTCTGGTCCACCCAATCCT         |
| Chr3 | SSR12032 | 103.269 | 23296186         | GGGGGTTTGAATTGAATGTG        | CTCTTCTTTCCCCCTTTGCT        |
| Chr3 | SSR18428 | 119.278 | 26417833         | CCATTCACCTTCCTTTCCAGC       | TGGTTTCAAGACCACCCTCT        |
| Chr3 | SSR21008 | 121.246 | No Hits          | TTGTCCACCTTGGATGTGAA        | CCCACCTTTCCCTTTAACCC        |
| Chr3 | SSR01056 | 122.909 | No Hits          | AAAGGGAAAAGTAAATTGCCA       | AGCAGTTCGGATGATATTGGA       |
| Chr3 | SSR17264 | 123.523 | 27811206         | CCCTCCCACCTTCACTATCA        | ATTGTCAACAAGAAACAGTGTGA     |
| Chr3 | SSR18141 | 126.932 | 28666375         | ATGTCAATATGTGGGACCCG        | TCGTAATAAATGGATGGCCC        |

|      |           |         |          |                             |                            |
|------|-----------|---------|----------|-----------------------------|----------------------------|
| Chr3 | SSR02736  | 130.232 | No Hits  | ATGGGTGTGTTAGAAAGATTAGGA    | CCAATTGATTTGGATTGGACA      |
| Chr3 | SSR05572  | 133.466 | No Hits  | GCAAACCATAAGTTTCCCCA        | GATCGATATTGCAACGAATTACA    |
| Chr3 | SSR13949  | 136.079 | No Hits  | CCCATCAATCCCAGTTCATC        | GTGCTGTTGCCATAAACCCCT      |
| Chr3 | SSR16238  | 137.329 | 31163143 | TCCGGATCTCTACCAAATGAA       | TCAGAGCATAAAACCAGTGTGT     |
| Chr3 | SSR11594  | 139.091 | 31068516 | GGCGAAAGATGAACAGAAGC        | CCATGTTTTCGGTTTCCTTC       |
| Chr3 | SSR21304  | 142.913 | No Hits  | CCTCACCATGGTATTATCAATCG     | GAATTCTTCTCGAATGTTTCCAA    |
| Chr3 | SSR21456  | 150.866 | No Hits  | AAGTGGGAAGGTTTGGAGGT        | TTCTTTTTCCCCCTTCATT        |
| Chr3 | SSR13974  | 152.46  | 32586332 | ATGGAGTGTCAAGCAAGCAA        | ATTGGGATTAGCAGCTTCCC       |
| Chr3 | SSR06011  | 153.532 | No Hits  | AGGGTCCAACCTCAAACCTCAA      | GCCCACCCTTAACATCTTACC      |
| Chr3 | SSR15124  | 161.296 | No Hits  | TCCACCCAATCTTTCACCTC        | AGTGCTCTTACATTTGCCA        |
| Chr3 | SSR13990  | 164.246 | No Hits  | CCAAATGCGGTGAAAAAGAT        | GGGATTCTCTTACCCCAA         |
| Chr3 | SSR04628  | 165.078 | No Hits  | CCAACTTTTCGTAATGATTGAGAG    | GTGAGCGTCAGAGCAATTCA       |
| Chr3 | SSR23177  | 165.672 | No Hits  | TGGATGAATGATGCCACAGT        | CAAAAGCCTGTCTTGGTAAAAA     |
| Chr3 | SSR03066  | 173.006 | 37239584 | CAAAACTTAAGGACCGAAAGGA      | ACATGGTTGGTTAGTGGCCT       |
| Chr3 | SSR19521  | 173.316 | No Hits  | CAACCACACACAAATFCCA         | ATATGCCGCCCTAGAAAACA       |
| Chr3 | SSRw363   | 174.632 | 38975987 | TGCCTTCTCCTTTCCTTCA         | CCAAACAACACCATCAGAAAACA    |
| Chr3 | w2-8      | 175.1   | No Hits  | gAACCCAAATTggCATTAggT       | gCATgTCTCTCTCCCTCAgC       |
| Chr3 | SSRW2-168 | 176.148 | 39694820 | TGTCCTTCCCATTCAATCGT        | CCACAGTTTGTGCATCCAAG       |
| Chr3 | SSR00733  | 178.079 | No Hits  | TCAAATTGTGATAGAGAGGCAGA     | CCTCACAACCAAAAAGGTCAA      |
| Chr4 | SSR20307  | 0       | No Hits  | CCAAAAGGTCATTCGGTTCA        | CGAAAAGTCAAGAAGAAACACAA    |
| Chr4 | SSR00012  | 4.97    | No Hits  | TCTCACCATGGTCACCTAATG       | GGTCATTGAAGAGTCAAGTTGG     |
| Chr4 | SSR01949  | 6.938   | 823261   | AGGAAAACCGGAAGCAGAAT        | TCCACAGAACAACCGTGAAA       |
| Chr4 | SSR14026  | 7.379   | No Hits  | TACCGGAGAAATCATCGAGC        | TCGCTAAACTCCAACACGAA       |
| Chr4 | SSR26406  | 7.541   | 5276352  | AGCACACTTGGGTGGATTTC        | CCTTTTCATTTGCAAACCTCC      |
| Chr4 | SSR23603  | 7.587   | 5973993  | GACCATTTACCTTGCCATTTT       | GAAAGCGAGCTAGGGCTTTT       |
| Chr4 | SSR19044  | 7.735   | No hits  | TgAAAAGAACATATggggCA        | TgCAAACATAACAATTCgATCC     |
| Chr4 | SSR21730  | 7.887   | No Hits  | TTTTGTGCTGCTGATGAAGC        | TTCTCATCGCAGGTGAAGTG       |
| Chr4 | SSR05005  | 10.095  | 10542520 | CAGATTTAGCCAGTGGGTCC        | ATCAGGGATCAGTCAATGGC       |
| Chr4 | SSR05783  | 12.182  | 3363484  | AAAAGTCCCACAACATATGGAAA     | TGGACAAAACCAAGTCCCCT       |
| Chr4 | SSR19034  | 18.07   | 2972019  | TCTTGCTTATCCCACCGTTC        | GGGTTTCAAAAACATTAACCCA     |
| Chr4 | SSR03481  | 28.122  | 12971131 | TGTCGTCCTTTTCCCTCCTT        | AGAAACATGGTATGATATGTTGGA   |
| Chr4 | SSR07130  | 38.149  | No Hits  | CCACACACACACACAGTCACA       | TCCCATTGTCCCTCACTCTC       |
| Chr4 | SSR17911  | 50.334  | No hits  | TGGAAGAGTGAGAAATGGGC        | TGGGAGAAACGTTCTTTATTTTT    |
| Chr4 | SSR26165  | 51.919  | No Hits  | TCTTTTGTGGTGAAAATTGAAA      | CCTTCTCATGTGATTGTCTTTTTG   |
| Chr4 | SSR22862  | 52.641  | No hits  | AATTGGGTCAAAGAAAGGGG        | TCGTCAAATGAATCTCCGA        |
| Chr4 | SSR29080  | 54.698  | No Hits  | TTTTGCAATCAACCATTTTCC       | GCCCATTCCCAATATATCCC       |
| Chr4 | SSR22155  | 55.8    | 22948132 | AAACGGACATGTTAGGTGGC        | TGGATTATTTAGGACAAAAGTCAA   |
| Chr4 | SSR04454  | 56.572  | 16371689 | GGAAAGTGTTGTGTTGCTCTTG      | GATCCATTTGATGCATTGCT       |
| Chr4 | SSR21197  | 56.6    | 23134766 | AAACCATTTGGTATTGGCGA        | GTCCAACCAAAACCAAGCCTA      |
| Chr4 | SSR18551  | 56.644  | 21268560 | GATGTGCATGTGATCCAACAG       | TGAATCTACTTGGGTTCTGTTGT    |
| Chr4 | SSR17406  | 56.645  | No hits  | GAGCCATCCATCAGAGAGAGA       | ACCACAAGCTTCAGAGGTC        |
| Chr4 | SSR01552  | 61.118  | No hits  | CACGACTTGCCATTAACCCT        | CCCAAACCTTCCCCTCAAAT       |
| Chr5 | SSR19172  | 0       | 22085961 | CGAGGAGAAGGACTACGACG        | CGTGTGGAGCTTTCTCACAA       |
| Chr5 | SSR07184  | 13.851  | No hits  | CACCATTTCCACAAAACGA         | GCCATACCCTTCAACATAGGA      |
| Chr5 | SSR17464  | 15.767  | 21187949 | ATCTCAGCCCTTGGATCCTT        | TCTTCGAGAAATGGGATTTTG      |
| Chr5 | SSR14611  | 20.147  | No hits  | ATTTGGCTTCCAGTTGATG         | GAATCGAAAACCGATGAGGA       |
| Chr5 | SSR16691  | 22.454  | 9141668  | CATGTTGAGTGGAAAAATTGAAA     | TTCGTACATTGTCAAATGCG       |
| Chr5 | SSR23148  | 22.905  | 16426691 | TGCCGTTTGGATCACATAGA        | CAATACGCACAAAAAGCGAA       |
| Chr5 | SSR21280  | 23.231  | 7486163  | CCATGATTTCAAATACCCCTT       | TCTGTTTTCAAATTTGTTCCGGA    |
| Chr5 | SSR18593  | 23.414  | 129876   | TGGGCCTCAATCCTTGTCTA        | ATAAGGTGTGTGGGCCAAAG       |
| Chr5 | SSR23132  | 23.558  | 15531345 | GCCCTATCACTTCTTTGTTTTCA     | CAAGAAATGGGGTGGGAAGAA      |
| Chr5 | SSR16032  | 23.745  | No hits  | TCATGTCATCAATCACACCTTTC     | TTTTTATCTTTTGTGAGACTTGTTTT |
| Chr5 | SSR11969  | 23.76   | 5973902  | GGGTCATACCCAAAAGGGAG        | TGCTTTAGCCGACAACTCAA       |
| Chr5 | SSR19836  | 23.778  | No hits  | TGCAGAAACATGAAAAGGGA        | TGATTGAGTCCCATATGCC        |
| Chr5 | SSR14269  | 23.87   | 13002103 | GGAAATGGGAGATACACGGA        | GCACTTCCAGTTCCATGCT        |
| Chr5 | SSR01534  | 23.884  | No hits  | CTTCTGCTCCGCTTCCTTA         | GGAAGAAACCCACCAGAACA       |
| Chr5 | SSR15818  | 23.885  | 18966224 | GGACATGTCAACTCCCCTGT        | GCCTTAGCCTGAAAGACCA        |
| Chr5 | SSR21291  | 23.9    | 16273295 | CACTCCACAAGCAAACCAA         | CTATGGCGGAGAAGGAGTTG       |
| Chr5 | CSJCT315  | 23.913  | No hits  | CCACgAAATACAgATCAgCAAC      | CACgTTACATTggACgAgAgAT     |
| Chr5 | SSR01610  | 23.945  | No hits  | TGGTTGTATATAGAAGGAAGATGTTGA | CCCTTTGAACGAAATCCAAA       |
| Chr5 | SSR19019  | 23.99   | No hits  | AgCTAgCTgCACCCACAAC         | AAAATATCCggAATCTTgTCAATC   |

|      |           |         |          |                             |                             |
|------|-----------|---------|----------|-----------------------------|-----------------------------|
| Chr5 | SSR14517  | 24.132  | 9375222  | TCCCCATATGTTCTTCTCGC        | AAGCTAAGGCAAACCAACCA        |
| Chr5 | SSR20895  | 24.414  | No hits  | CCTCTTCCTCCTCTTCCTCC        | CCTTCCCCAATGTAGCAAAG        |
| Chr5 | SSR13340  | 24.532  | No hits  | GCTTTACATGGCTTCTCCCA        | TTTTCTTGGCGACGATTAG         |
| Chr5 | SSR06447  | 24.811  | 8580058  | AAGTATGACGACACCCTTCG        | CGAAAACCGAAAGGTACATA        |
| Chr5 | SSR18729  | 25.669  | 13006047 | TCCAATCCCCTCTGGTTTC         | TCTTTCCAACACTAACCTTGGATT    |
| Chr5 | SSR15893  | 26.407  | No hits  | ATGGGAGCTACACGTTGAGG        | ATAGGCTTCCATTCCAGGGT        |
| Chr5 | SSR07284  | 28.527  | No hits  | CTGCAGAATGTTTTGAGGCA        | CCAACCTTGGAGGTGTTGAT        |
| Chr5 | SSR01498  | 38.314  | 22655145 | GGCGCCACAAATATTCAACA        | CCACAAACGTAAAGAGATTCA       |
| Chr5 | SSR13620  | 57.781  | 24082650 | TTTTCCGGTTCTACAATGGC        | AGTTCAATCTTGTATGAGTGATATTGA |
| Chr5 | SSRCSWCT  | 60.733  | No hits  | TTgAATTATgggTTCATTTTT       | gACAATgATAAACTTCCCTgA       |
| Chr5 | SSR06303  | 67.05   | 24878262 | AGCTCTCAACAACGAAGGGA        | TGACTTTCTTGATGGTACCGC       |
| Chr5 | SSR03514  | 80.211  | 26718521 | TAGGGTCCCCTTCCCCTCATA       | GGGTACCCAAAAGCAAGTGA        |
| Chr5 | SSR02459  | 89.88   | 27816197 | TCGGAAGATGGGTTATTTGG        | TGACCCCTCACATTCTCTCC        |
| Chr6 | SSR17962  | 0       | 776867   | CAAAAGAAAAGCGCAAAAGG        | GTCCCACTCCCAAAAACAGA        |
| Chr6 | SSR22275  | 2.058   | 1016060  | ATACTTCGCCATTGACGCTT        | TTACTAGGCGTTGTGGGAGC        |
| Chr6 | SSR02384  | 5.577   | 2783756  | AAAAATCCGACAAATCGTGC        | GGTCAAATGTTGCCTTTTGC        |
| Chr6 | SSR11343  | 9.365   | 4133077  | GTGGGGTTGCTTTTGGATAA        | CAATGGTTGCTTTGCTTCAA        |
| Chr6 | SSR01012  | 9.94    | 3855950  | TCCAAAAATCGCGACCTAAA        | GTGAGCCGTTGATTTCTCGT        |
| Chr6 | SSR02237  | 20.165  | 5124994  | CTGAAAACCTGGGGAATGGAA       | GTTTGTTCCTCGAAAAGGA         |
| Chr6 | CSJCT674  | 26.307  | No hits  | TAgAAAggAAgggATgTgATTAgg    | ACAggTggTTAgAggTTAgAgCTg    |
| Chr6 | SSR24776  | 29.738  | 5812826  | GTTCCTTGGTGCCATTGTTT        | TCCAATTCCTCTCTCTTCG         |
| Chr6 | SSR33284  | 38.229  | 6610818  | TGGGAAATGGATAATTTGGTG       | GGCATCCATCATTCTTTTGG        |
| Chr6 | SSR10954  | 49.454  | 9453905  | TGCAAAACCAATTATTTGATATAGAGA | TTTCGGCAAAGAAGACTAGGAG      |
| Chr6 | SSR21318  | 50.756  | 9372844  | GACACCCCATTCCTCATCAT        | GCTTCATCACTCCCAATTCAG       |
| Chr6 | SSRccap32 | 52.682  | 9764418  | CGATCGTATTGATTAGATAAGCG     | CGATTTCGCACTTTTCTTTCTTC     |
| Chr6 | SSR18405  | 53.077  | 10051003 | CGCAGGTGCATCTCATGTAA        | GACAAACAAGGGGACGAAAA        |
| Chr6 | SSRccap83 | 55.842  | No hits  | CgTgAACCTCCgATCTCATT        | AgTCAAAgTTggCCAgTCgT        |
| Chr6 | SSR13884  | 58.198  | 11069339 | GGATAATCCTGATTCCCTGTGG      | TGTGCAACTGAAAACGAAGC        |
| Chr6 | SSR16889  | 61.729  | 14857891 | TCACATATTGGAATTTGAGGACA     | AAGAGCAAACATTTGTTGAAACTC    |
| Chr6 | SSR18534  | 63.275  | 16606287 | GCCCTGAAACTGAAGCTGAG        | CTGATTGCCAAAGTCAAGCC        |
| Chr6 | SSR28064  | 65.136  | 16465180 | GAAATTAATTAAGATCAAGAAAGGGA  | ATCACTTGCATCACGTCTGG        |
| Chr6 | SSR18718  | 75.329  | 1611048  | TGAAGCAAAGTAACCCACACA       | CACAAATGGATTACAGAGCGAA      |
| Chr6 | SSR15955  | 76.709  | 18995075 | TTTGAGCCTTGAGGCAAAGT        | GCAATTCAACGTAATGGGCT        |
| Chr6 | SSR04252  | 83.129  | 20075416 | AAAGAACACACATGGTGGTGG       | AAGGAGTGGTTGAATAGGCCG       |
| Chr6 | SSR19165  | 89.004  | 21344610 | AATCCACGTTGGTTGTCTGTT       | GAAGGGCCAAAATGTTTCA         |
| Chr6 | SSR19970  | 101.362 | 23339816 | TACCCGGTAATCTTCCCCTC        | CAACAGAAGCAAAGTAGGTGGA      |
| Chr6 | SSR15482  | 107.356 | 24003956 | AAAAACAGCAGGGCAGAAGA        | GTTGAGCTGTCTATGGGGGA        |
| Chr6 | SSR15316  | 111.513 | 24577348 | TCCAATTTTCTGGCGAAGAC        | CAACCGAAACAACGTCTCCT        |
| Chr6 | SSR21115  | 118.335 | 25689547 | GCAGCAGTACCCAAACCTAT        | CACTGTGAACATATGGGAAGGA      |
| Chr6 | SSR02460  | 120.751 | 26252541 | CTCAGAAACCCTTCCACCAA        | CTGTACCGGAGGACAGTTT         |
| Chr6 | SSR18251  | 136.478 | 28192598 | AAATGGCAAAATAATGCATGG       | GAGACAGCCACAGAGATTTGG       |
| Chr6 | SSR07477  | 138.205 | 29009111 | CGTTTCATTCAATTGCTGCAC       | GCCCAGATTTGGTCATTTCTT       |
| Chr6 | SSR03357  | 138.624 | 28813523 | AAAAGGGCAAGTCAAAACCC        | GGGGAGGAAGAGAGACCCTT        |
| Chr7 | SSR30647  | 0       | 448536   | GAAATGAGAGCAAGTTGCAAAA      | AGGCGTAAATCTGACCCTTG        |
| Chr7 | SSR15432  | 13.611  | 4372675  | TGAGAATTGGATGTGCGAAA        | TTAGTTCAATTGACATGGGATGAT    |
| Chr7 | SSR12994  | 14.856  | 2869178  | TCATCTGCAATGCAAAGAC         | ACCGTGGATCTTAAGCCAGA        |
| Chr7 | SSR00084  | 15.226  | 40139    | AAGTGTGAGCATGTCGTTTCG       | AAACGTCAGCCACACCTTTC        |
| Chr7 | SSR16591  | 33.436  | 12291486 | TTTTGGGTAGAAATCAAGAAACG     | GGGAATCAAACATTCATGGC        |
| Chr7 | SSR14861  | 40.786  | 12975963 | ATTTCTTCCCCACCAAAAC         | ATGAATCCTCCTCCAGAGC         |
| Chr7 | SSR22097  | 44.4    | 13483521 | ACGGTCATCCGAATTCTCAG        | CAACAAACGATCCAACATCG        |
| Chr7 | SSR06609  | 65.958  | 15169712 | TCTAATGGAAACCCTCTCCG        | GAGACGGAATCGGAATCAAA        |
| Chr7 | CSWCT11   | 71.228  | No hits  | ATAGGCAATATGGCTTCT          | CACTTCAATGGAGTTTCG          |
| Chr7 | SSR23373  | 85.714  | 17467963 | CCCACCATGCAAAACTCTTT        | GTCTTTGCGCACCTCTCACT        |
| Chr7 | SSR23073  | 87.63   | 18153573 | ATGAGGGAAGACTTTGGGGT        | TTTCGTGAAGAAGGGGAAGA        |
| Chr7 | SSR00477  | 92.506  | 19197072 | TATTGCGATGGTTGACGTG         | GCAAATTCGGAGTTTCGTTA        |
